# Supplementary material for: Structure, stoichiometry and transport properties of lithium copper nitride battery materials: combined NMR and powder neutron diffraction studies
Source: Royal Society of Chemistry journal article supplement (doi:10.1039/c1cp20368a), 2011-01-01
Supplement: c1cp20368a.pdf [file c1cp20368a.pdf]

# Structure, Stoichiometry and Transport Properties of Lithium Copper Nitride Battery Materials: Combined NMR and Powder Neutron Diffraction Studies

Andrew S. Powell, Zlatka Stoeva, Ronald I. Smith, Duncan H. Gregory and Jeremy J. Titman

## Electronic Supplementary Information

### Linewidth of the $^7\text{Li}$ Central Transition

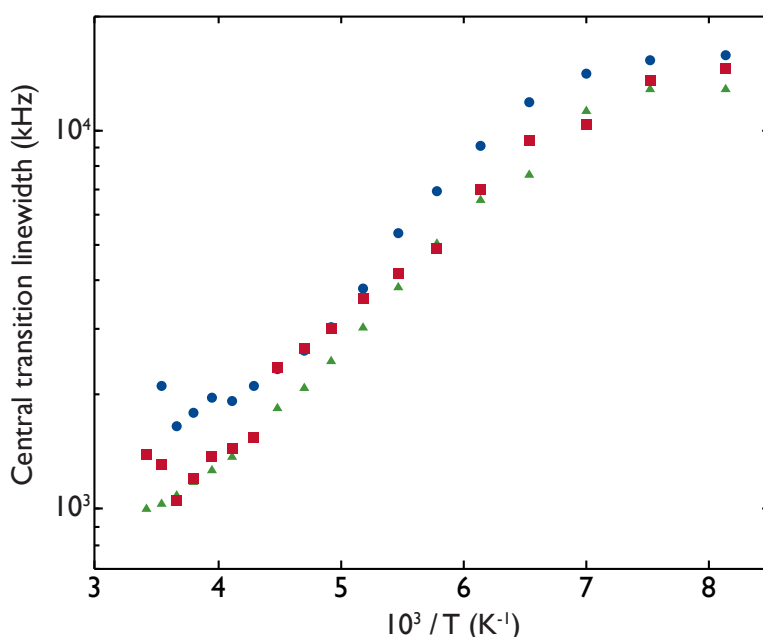

Figure S1. Linewidth of the  $^7\text{Li}$  central transition as a function of temperature for **1** (blue circles), **2** (green triangles) and **3** (red squares).

### Calculation of Diffusion Coefficients

Diffusion coefficients for intra- and inter-layer processes are obtained from the corresponding mean  $\text{Li}^+$  jump rate by the Einstein-Smoluchowski relation

$$D = \frac{d^2 f \nu}{g}$$

where  $d$  is the distance between Li sites and  $g$  is a dimensionality factor. Ion hopping was assumed to be uncorrelated in both cases, so that  $f$  was set to 1. For intra-layer diffusion the dimensionality factor  $g$  is 4 and  $d$  is the distance between adjacent Li(2) sites measured by neutron diffraction (Table 2). For inter-layer diffusion  $g$  is 2 and  $d$  is the distance between the exchanging Li(1) and Li(2) sites obtained by neutron diffraction (Table 2).

### Calculation of High-temperature $^7\text{Li}$ $C_Q$ Values

Low-temperature  $^7\text{Li}$   $C_Q$  values for the Li(1) site which vary with Li environment were obtained by spectral simulation as described in the main text. Table S1 shows an average low-temperature  $C_Q$  for the Li(1) site in each material obtained from Table 3 and low-temperature  $^7\text{Li}$   $C_Q$  values for the Li(2) site which are obtained directly from the spectra recorded at 193 K in Figure 3. Weighting by the occupancies of the Li(1) and Li(2) sites results in the average high-temperature  $\langle C_Q \rangle$ .

Table S1. Experimental low-temperature and calculated high-temperature Li(1) and Li(2)  $C_Q$  values

| Sample (x)               | <b>1</b> (0.17) | <b>2</b> (0.29) | <b>3</b> (0.35) |
|--------------------------|-----------------|-----------------|-----------------|
| Li(1) Occupancy          | 0.83            | 0.71            | 0.65            |
| Li(2) Occupancy          | 2               | 2               | 2               |
| $C_Q$ Li(1) / kHz        | 575             | 568             | 562             |
| $C_Q$ Li(2) / kHz        | -266            | -259            | -253            |
| HT $\langle C_Q \rangle$ | -19             | -42             | -53             |
